# Supplementary material for: Interaction of cobalt(ii) and nickel(ii) with a γ-linked, bis-β-diketone ligand to yield an unusual coordination motif
Source: Royal Society of Chemistry journal article supplement (doi:10.1039/b502334c), 2005-01-01
Supplement: b502334c.pdf [file b502334c.pdf]

Electronic Supplementary Information for Dalton Transactions  
This journal is © The Royal Society of Chemistry 2005

**Interaction of cobalt(II) and nickel(II) with a  $\gamma$ -linked, bis- $\beta$ -diketone ligand to yield an unusual coordination motif**

**Bai-Shu Zhen, Xiao-Yi Zhang, Huai-Wu Zhu, Shi-Xia Luo, Leonard F. Lindoy, John C. McMurtrie, Peter Turner, Gang Wei**

**Table 1S.** Pertinent Geometry Details (bond lengths in Å, angles in °) for [CoL(H<sub>2</sub>O)<sub>2</sub>].H<sub>2</sub>O and [NiL(H<sub>2</sub>O)<sub>2</sub>].H<sub>2</sub>O (LH<sub>2</sub> = 2)

| [CoL(H <sub>2</sub> O) <sub>2</sub> ].H <sub>2</sub> O |           | [NiL(H <sub>2</sub> O) <sub>2</sub> ].H <sub>2</sub> O |            |
|--------------------------------------------------------|-----------|--------------------------------------------------------|------------|
| Co(1)-O(1)                                             | 2.0330(9) | Ni(1)-O(1)                                             | 2.0235(9)  |
| Co(1)-O(3)                                             | 2.0723(9) | Ni(1)-O(3)                                             | 2.0549(10) |
| Co(1)-S(1)                                             | 2.4810(5) | Ni(1)-S(1)                                             | 2.4074(5)  |
|                                                        |           |                                                        |            |
| O(1)-Co(1)-O(3)                                        | 100.92(4) | O(1)-Ni(1)-O(3)                                        | 96.84(4)   |
| O(1)-Co(1)-O(1 <sup>1</sup> )                          | 165.58(5) | O(1)-Ni(1)-O(1 <sup>1</sup> )                          | 173.65(5)  |
| O(1)-Co(1)-O(3 <sup>1</sup> )                          | 89.53(4)  | O(1)-Ni(1)-O(3 <sup>1</sup> )                          | 87.76(4)   |
| O(1)-Co(1)-S(1)                                        | 79.55(3)  | O(1)-Ni(1)-S(1)                                        | 82.07(3)   |
| O(1)-Co(1)-S(1 <sup>1</sup> )                          | 90.18(3)  | O(1)-Ni(1)-S(1 <sup>1</sup> )                          | 93.46(3)   |
| O(3)-Co(1)-O(3 <sup>1</sup> )                          | 87.62(6)  | O(3)-Ni(1)-O(3 <sup>1</sup> )                          | 87.46(6)   |
| O(3)-Co(1)-S(1)                                        | 92.48(3)  | O(3)-Ni(1)-S(1)                                        | 91.73(3)   |
| O(3)-Co(1)-S(1 <sup>1</sup> )                          | 168.90(3) | O(3)-Ni(1)-S(1 <sup>1</sup> )                          | 169.63(3)  |
| S(1)-Co(1)-S(1 <sup>1</sup> )                          | 89.55(2)  | S(1)-Ni(1)-S(1 <sup>1</sup> )                          | 90.89(2)   |
| symmetry operator: $-x + 1, y, -z + \frac{1}{2}$       |           |                                                        |            |

**Table 2S.** Hydrogen Bond Parameters (distances in Å, angles in °) for [CoL(H<sub>2</sub>O)<sub>2</sub>] $\cdot$ H<sub>2</sub>O and [NiL(H<sub>2</sub>O)<sub>2</sub>] $\cdot$ H<sub>2</sub>O (LH<sub>2</sub> = 2)

| compound 1                                                                                       | atoms                                   | distance | distance     | distance     | angle  |
|--------------------------------------------------------------------------------------------------|-----------------------------------------|----------|--------------|--------------|--------|
|                                                                                                  | D-H $\cdots$ A                          | D-H      | H $\cdots$ A | D $\cdots$ A | DHA    |
|                                                                                                  | O(3)-H(3O) $\cdots$ O(4)                | 0.77(2)  | 1.99(2)      | 2.735(2)     | 163(2) |
|                                                                                                  | O(3)-H(3OB) $\cdots$ O(2 <sup>2</sup> ) | 0.85(2)  | 1.79(2)      | 2.627(1)     | 173(2) |
|                                                                                                  | O(4)-H(4O) $\cdots$ O(1 <sup>3</sup> )  | 0.76(2)  | 2.15(2)      | 2.878(2)     | 160(2) |
| symmetry operators: <sup>2</sup> ; $-x + 3/2, -y + 1/2, -z + 1.$ <sup>3</sup> ; $x, -y, z - 1/2$ |                                         |          |              |              |        |
| compound 2                                                                                       | D-H $\cdots$ A                          | D-H      | H $\cdots$ A | D $\cdots$ A | DHA    |
|                                                                                                  | O(3)-H(3OB) $\cdots$ O(4)               | 0.77(2)  | 2.00(2)      | 2.734(2)     | 160(2) |
|                                                                                                  | O(3)-H(3O) $\cdots$ O(2 <sup>2</sup> )  | 0.81(2)  | 1.83(2)      | 2.639(1)     | 172(2) |
|                                                                                                  | O(4)-H(4O) $\cdots$ O(1 <sup>3</sup> )  | 0.76(2)  | 2.13(2)      | 2.854(1)     | 158(2) |
| symmetry operators: <sup>2</sup> ; $-x + 1/2, -y + 1/2, -z.$ <sup>3</sup> ; $-x + 1, -y, -z.$    |                                         |          |              |              |        |

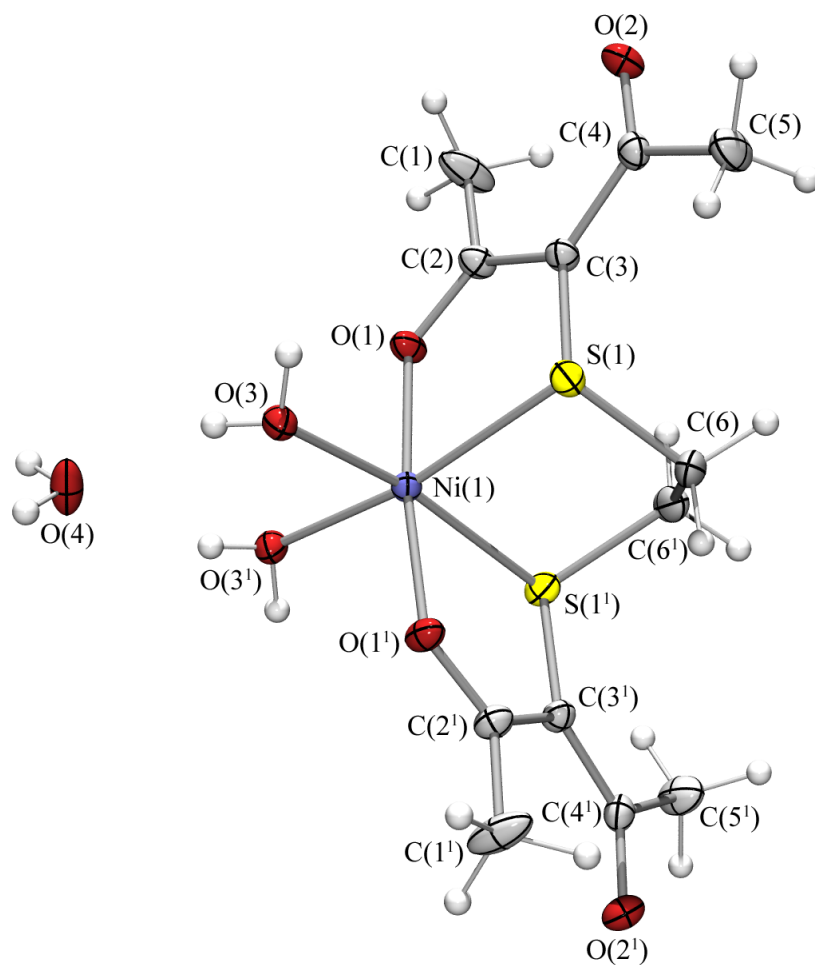

**Figure 1S.** ORTEP representation of [NiL(H<sub>2</sub>O)<sub>2</sub>]·H<sub>2</sub>O (LH<sub>2</sub> = 2) with ellipsoids drawn at the 50% probability level. Symmetry code <sup>1</sup>;  $-x + 1, y, -z + 1/2$ .
